# Supplementary material
Source: PubMed Central journal article supplement (PMC3086999)
Supplement: NIHMS286487-supplement-Supp_Figure_S1-S8_Table_S1-S2.pdf [file NIHMS286487-supplement-Supp_Figure_S1-S8_Table_S1-S2.pdf]

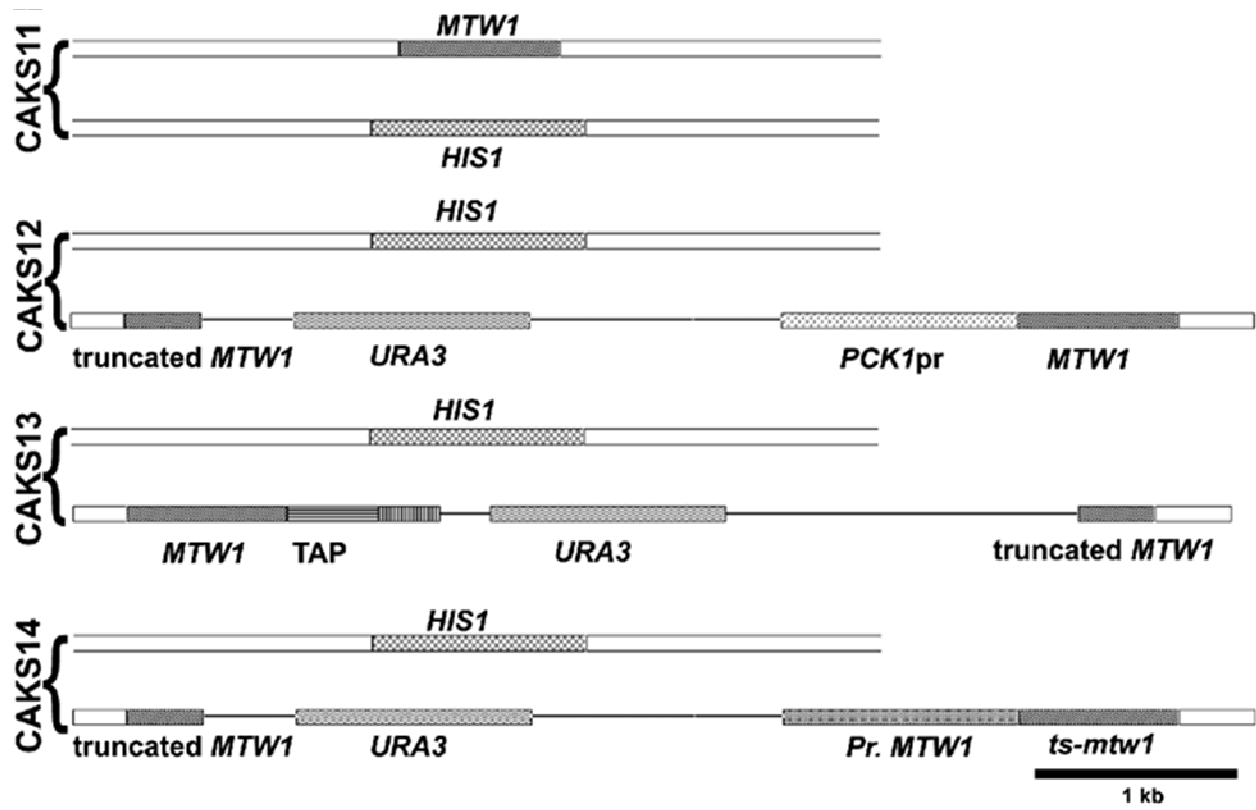

Supporting Figure S1

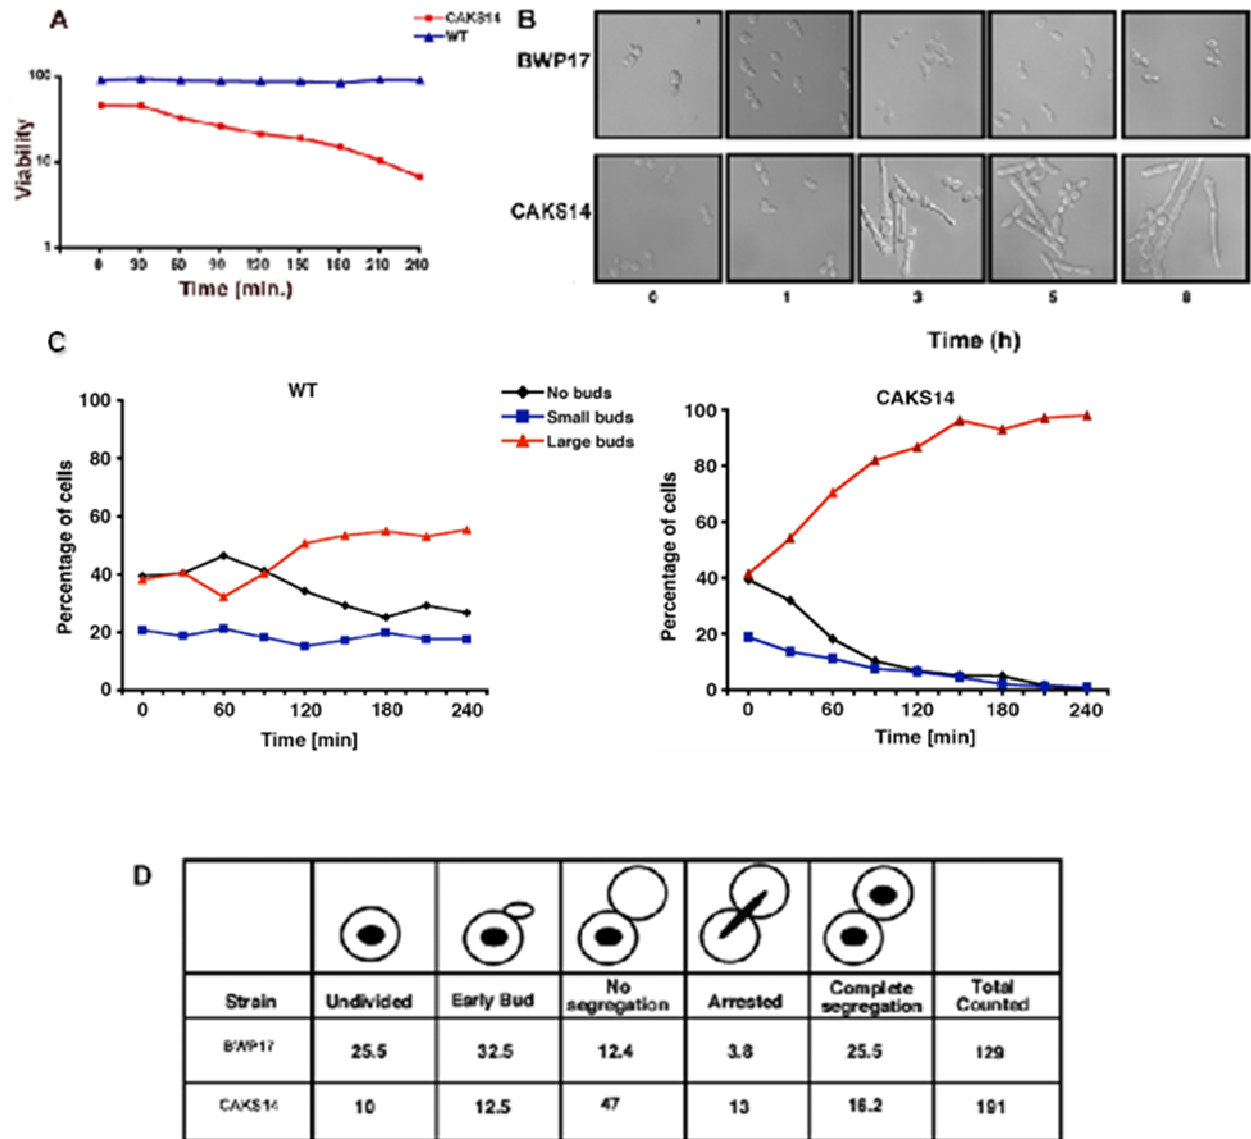

Supporting Figure S2

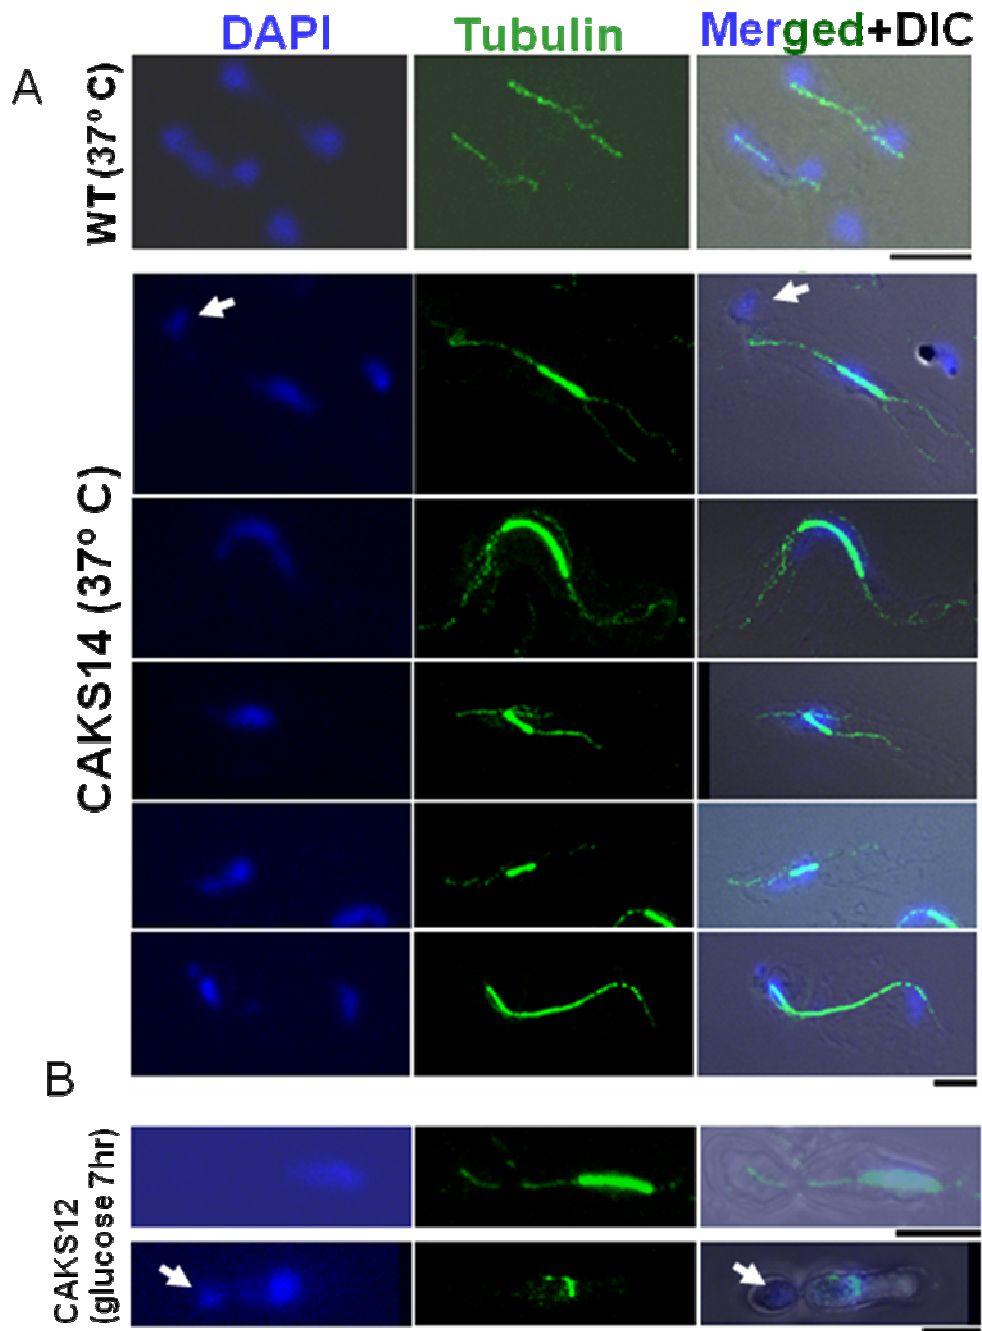

Supporting Figure S3

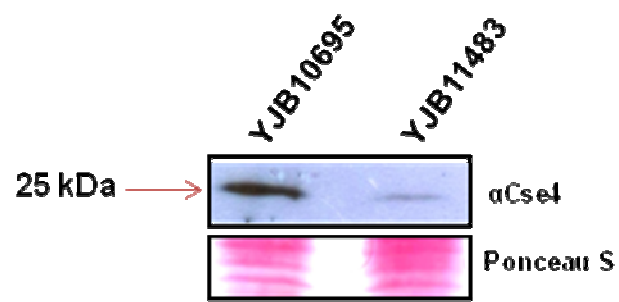

**Supporting Figure S4**

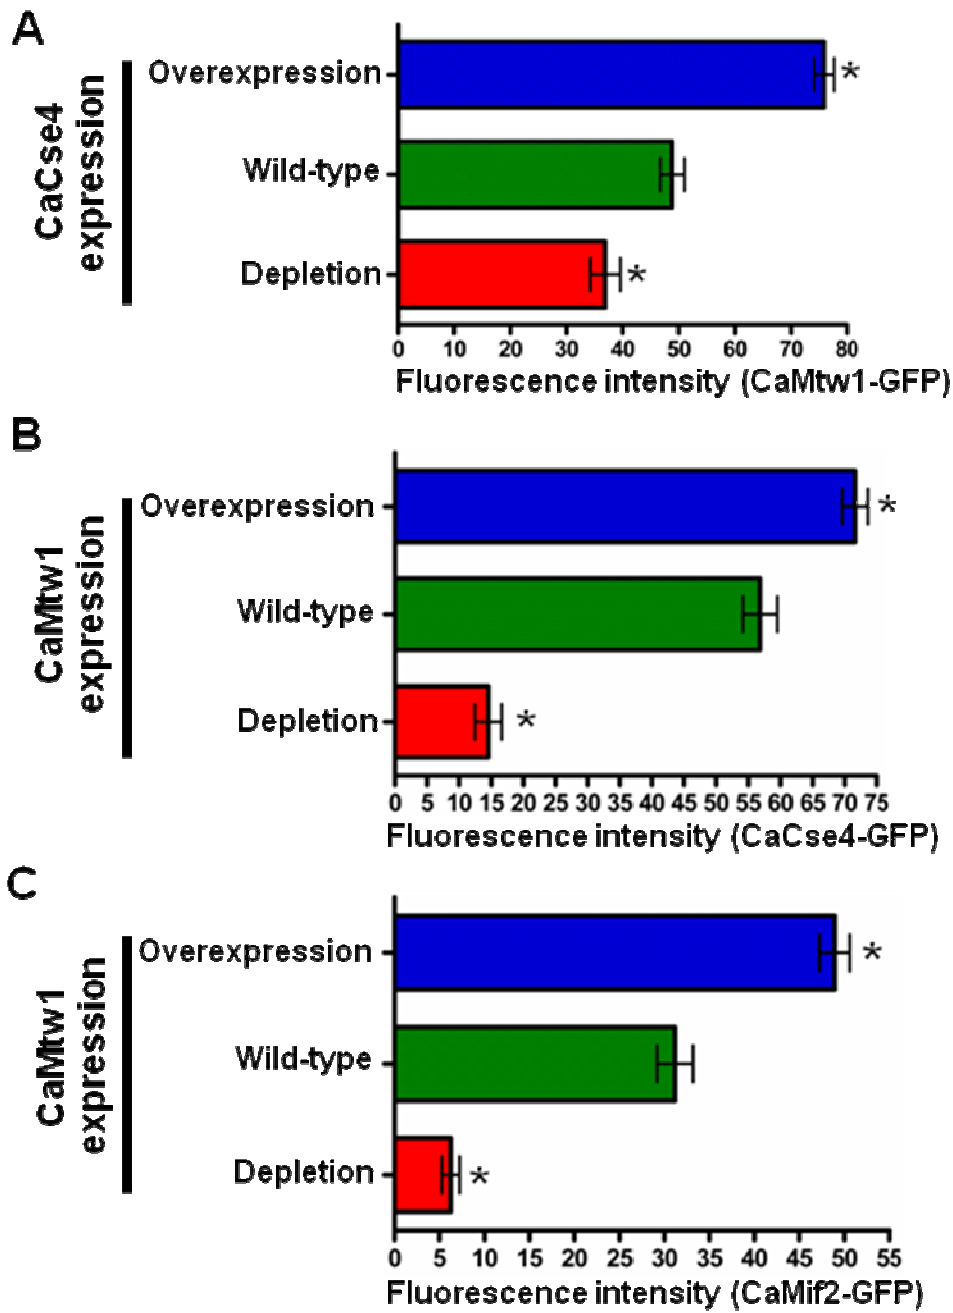

Supportng Figure S5

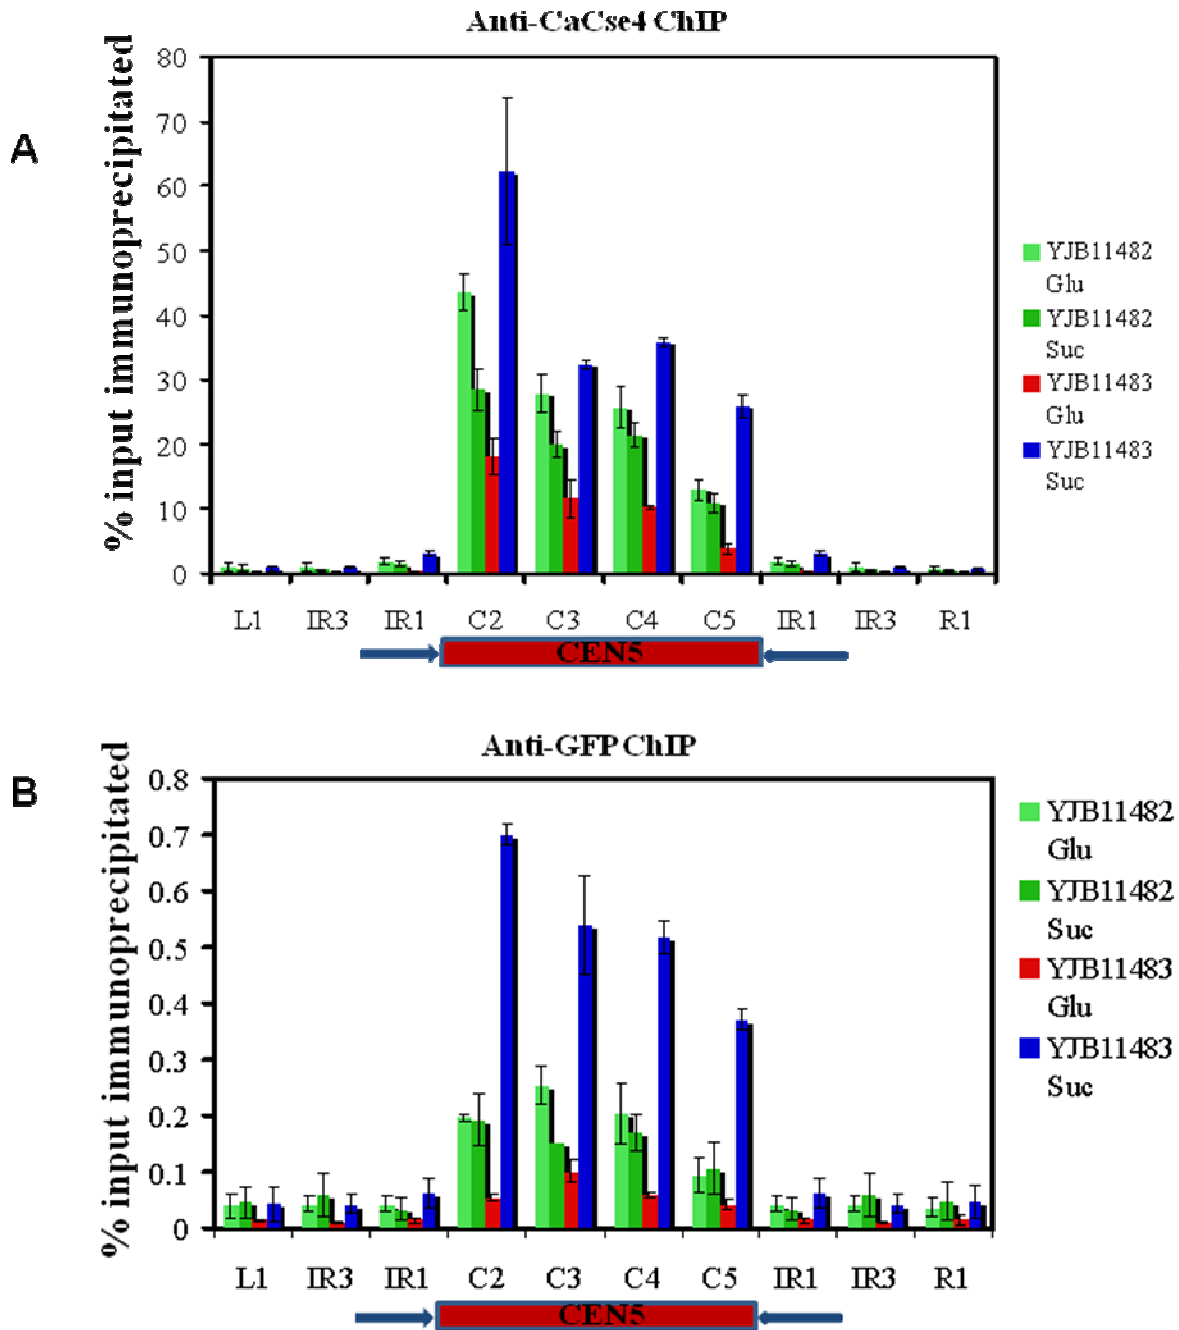

1 10 20 30 40 50 60 70  
 CaMtw1 MS DK T L D E R T A I L T E H L E F A F L T L I D D V I N A V N E I M Y K G T A I E T Y L K B Q K Q L M K N G I F T K V T E D E I E I  
 ScMtw1 M S A P T M . . R S T S I L T E H L G Y P R I S L V D D I I N A V N E I M Y K C T A A M E K Y L . . . . . L S K S K I I G E E D Y G E I K S  



80 90 100 110 120 130  
 CaMtw1 G M G K L E S L L E S T I D K N F D K F E L Y G L R N I F N I P K D L I P . . Y I Q L S H Q Q G I E F K S D N V E Q K R E F D Q Q I K N L Q  
 ScMtw1 G V A K L E S L L E N S V D K N F D K L E L Y V L R N V L R I P E E Y L D A N V F R L E N Q K D L V I V D E N E L K K S E . . . . . E K L R  


140 150 160 170 180 190 200  
 CaMtw1 L K I M Q E L Q L R K I L K L Q I V K V Q K L I K V L I A I D N D F K K I D F A S G G G G N E E S I R I L K N L Q P I D E T L Y F L I S Q I  
 ScMtw1 E K V N D V E L A P K K N E M L L K R V T K V K R L L F T I R G F K Q K L N E L L K C K D D V Q L Q K I L E S L K P I D T M T L L T D S L

210 220 230 240 250 260 270  
 CaMtw1 K N L I N Q I E Q L S N K V N T N L K T Q K F I . . . . . P N L R D K F I D G R T F R V L Q Q T G I W K D L E K N D I K I S V Q G N D N  
 ScMtw1 R K L Y V D S E S T S S T E E V E A L L Q R L K T N G K Q N N K D F R T R Y I D I R T N N V L R K L G L L G D K E . . . . .

280 290 300 310  
 CaMtw1 N N N N N N N N N T L E D L Q N Q D D I D M I I P E Q D D I D V D A I K N I N A Q I  
 ScMtw1 . D E K Q S A K P D A R T Q A G D I V S I D I E E P Q L D L L D D V . . . . . L

## Supporting Figure S7

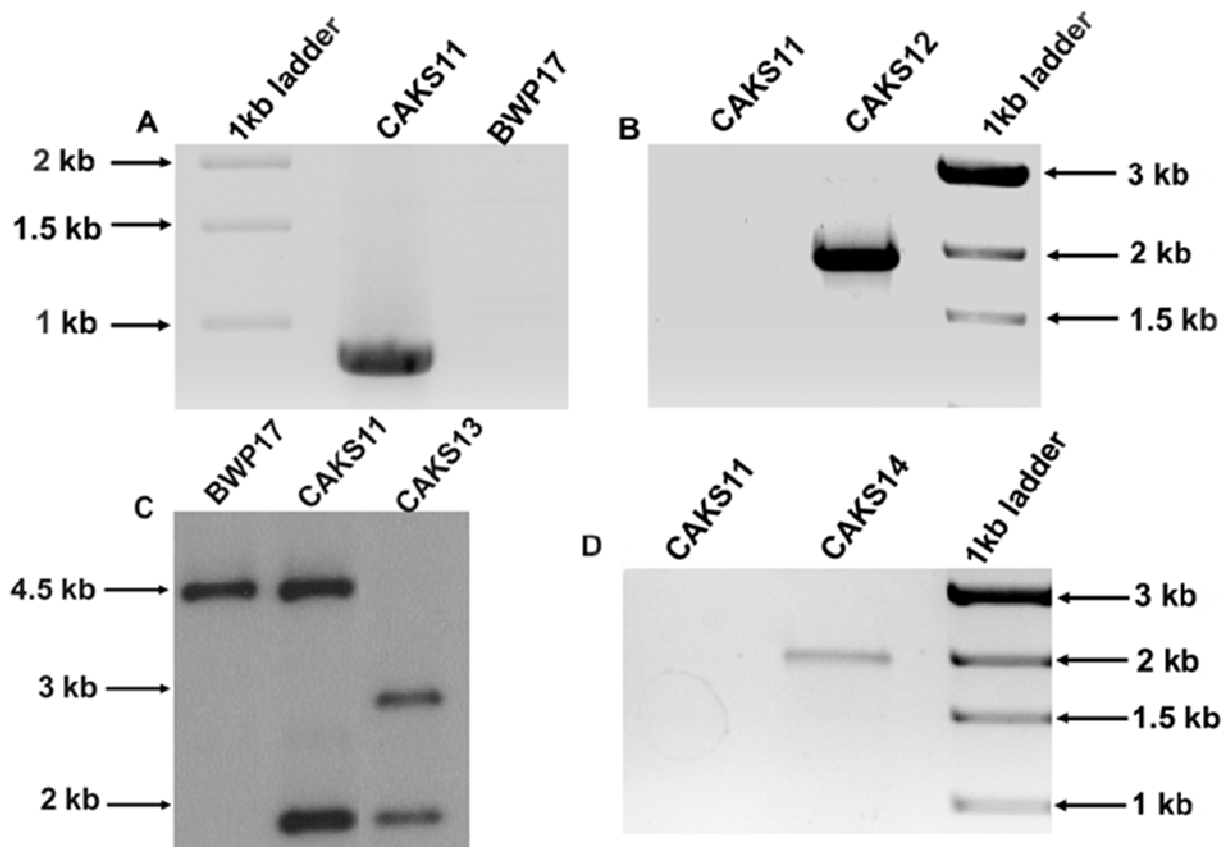

Supporting Figure S8



**Figure S1. Construction of CAKS11, CAKS12, CAKS13, and CAKS14.** Representative schematic of the diploid *CaMTW1* loci in strains CAKS11, CAKS12, CAKS13 and CAKS14 is shown. CAKS11 and CAKS12 carry one disrupted copy and a full-length *CaMTW1* allele. The full length *CaMTW1* allele is under control of either its own promoter (CAKS11) or a regulatable *PCK1* promoter (CAKS12). CAKS13 contains one allele of *MTW1*, which is truncated and the second allele is tagged with the TAP epitope at its C-terminus. CAKS14 carries one truncated allele and one full length allele with a G71E mutation (*tsMTW1*).

**Figure S2. CAKS14 cells arrested at G2/M phase of the cell cycle and showed chromosome segregation defects at 37°C.** (A) CAKS14 cell viability dropped dramatically between 0.5 h and 2 h after a shift in incubation temperature from 23°C to 37°C. Cells were harvested at 30 min intervals after the temperature shift. Cell viability was calculated by plating diluted aliquots of culture at the indicated time points on YPDU plates and counting the number of colonies that appeared after incubating the plates for 3 days at 23°C. (B) Representative DIC images of BWP17 and CAKS14 cells, harvested at the indicated time points, after the temperature shift from 23°C to 37°C. After 1 h, CAKS14 cells started to accumulate at the large-budded stage followed by bud elongation (elongated bud phenotype or pseudohyphae-like terminal phenotype). (C) Distribution of unbudded (G1), small budded (S) and large budded (G2) cells of BWP17 and CAKS14 after temperature shift from 23°C to 37°C. (D) Table representing nuclear morphologies determined by DAPI staining of DNA of the BWP17 and CAKS14 cells harvested at 3 h after the temperature shift.

**Figure S3. *CaMtw1* depleted cells and *ts-mtw1* mutant (at 37° C) showed similar defects in the spindle morphology.** (A) BWP17 (*MTW1/MTW1*) and CAKS14 (*ts-mtw1/mtw1*) cells (grown at 37° C for 3h) were fixed and stained with anti-tubulin (spindle) antibodies and DAPI

(DNA). (Bar, 5 $\mu$ m). (B) Representative images of CAKS12 (*PCK1pr-MTW1/mtw1*) cells grown in glucose for 7 h at 30°C. These cells showed short mitotic spindle, improperly migrated to the daughter bud, sometimes leaving some unattached DNA in the mother bud (indicated by white arrows) (Bar, 5 $\mu$ m).

**Figure S4. Confirmation of CaCse4 depletion.** Western analysis with anti-CaCse4 antibodies was performed on cell lysates of YJB11483 and YJB10695, grown overnight in succinate media and then transferred to glucose media and incubated for 7 h. Ponceau s staining of the membrane shows equivalent protein loading.

**Figure S5: GFP signal intensity measurement in CaMtw1-GFP, CaCse4-GFP, CaMif2-GFP strains.** (A) Average Mtw1-GFP signal intensity in the kinetochore region was measured in YJB11482 (*CSE4/cse4*) (grown in glucose media) and YJB11483 (*PCK1pr-CSE4/cse4*) in depletion (glucose) and overexpression (succinate) conditions for the *PCK1* promoter. For each strains and condition, the average pixel intensity, corrected for background, was determined for at least 100 cells and is shown as mean  $\pm$  SEM. \* indicates that signal intensity was significantly different than YJB11482 ( $p < 0.01$  by one-way ANOVA and Bonferroni post-tests). (B) Average Cse4p-GFP signal intensity in the kinetochore region was measured in YJB11553 (*MTW1/mtw1*) and YJB11554 (*PCK1pr-MTW1/mtw1*) in depletion (glucose) and overexpression (succinate) conditions for the *PCK1* promoter. For all strains and conditions, the average pixel intensity, corrected for background for at least 100 cells per condition, is shown as mean  $\pm$  SEM. \* indicates that signal intensity was significantly different than YJB11482 ( $p < 0.01$  by one-way ANOVA and Bonferroni post-tests). (C) Average Mif2-GFP signal intensity in the kinetochore region was measured in YJB12118 (*MTW1/mtw1*) and YJB12119 (*PCK1pr-MTW1/mtw1*) in depletion (glucose) and overexpression (succinate) conditions for the *PCK1* promoter. For all

strains and conditions, the average pixel intensity, corrected for background for at least 100 cells per condition, is shown as mean  $\pm$  SEM. \* indicates that signal intensity was significantly different than YJB12118 ( $p < 0.0001$ ) by one-way ANOVA and Bonferroni post-tests).

**Figure S6. Overexpression of *CaCSE4* results into higher recruitment of CaCse4 and CaMtw1 at centromere DNA.** (A) ChIP analysis with anti-CaCse4 antibody in YJB11483 and YJB11482 grown in succinate media (where *CaCSE4* is overexpressed from the *PCK1* promoter in YJB11483) showed increased binding of CaCse4 to the centromere of chromosome 5. (B) ChIP analysis with anti-GFP antibody in the same strains grown under the same conditions revealed increased recruitment of CaMtw1-GFP across the chromosome 5 centromere.

**Figure S7. Identification of CaMTW1:** The CaMtw1 sequence was identified by a BLAST search with *S. cerevisiae* ScMtw1 as a query sequence against the *Candida albicans* genome database. This sequence analysis suggests that ORF19.1367 has significant homology to ScMtw1. A pairwise sequence comparison of ScMtw1 and CaMtw1 revealed that they share overall 29% identity. The homologous regions are restricted to two blocks localized at the N-terminus of the protein sequence (9-48th and 67-102nd amino acids of CaMtw1).

**Figure S8. Confirmation of the construction of the strains CAKS11, CAKS12, CAKS13 and CAKS14.** (A) PCR with genomic DNA of CAKS11 and BWP17 using MTW1-15 and MTW1-17 primers amplified the desired 870 bp DNA fragment in the case of CAKS11 but not in BWP17. (B) PCR with CAKS11 and CAKS12 genomic DNA using MTW1-8 and CA26 primers resulted in amplification of 2 kb DNA fragment in case of CAKS12, indicating that integration of pr. *PCK1-MTW1* occurred at the correct locus of the genome. (C) Genomic DNA samples of BWP17, CAKS11, and CAKS13 were digested with *AflIII*, blotted to Zeta-probe membrane (Millipore) and probed with an 805 bp *MTW1* promoter sequence. Lane1. BWP17 yielded a

single predicted ~4.5 kb band, lane 2: CAKS11 gave an additional, deletion-specific ~2 kb band, and lane 3: CAKS13 yielded a deletion-specific and one *MTW1*-TAP integration specific ~3 kb band. (D) PCR amplification with CAKS11 and CAKS14 genomic DNA using CAMA2con and Cal2 primers resulted in amplification of a 2056 bp fragment DNA in case of CAKS14, confirming that ts*MTW1* cassette has integrated into the correct locus of the genome.

#### References:

Joglekar, A. P., Bouck, D., Finley, K., Liu, X., Wan, Y., Berman, J. *et al.*, (2008). Molecular architecture of the kinetochore-microtubule attachment site is conserved between point and regional centromeres. *J Cell Biol.* **181**:587-94.

Wilson, R. B., Davis, D., Mitchell, A. P. (1999). Rapid hypothesis testing with *Candida albicans* through gene disruption with short homology regions. *J Bacteriol.* **181**:1868-74.

**Table S1: List of strains of *C. albicans*:**

| Strain name | Genotype                                                                                                          | Source                    |
|-------------|-------------------------------------------------------------------------------------------------------------------|---------------------------|
| BWP17       | $\Deltaura3::imm434/\Deltaura3::imm434$<br>$\Deltahis1::hisG/\Deltahis1::hisG \Deltaarg4::hisG/\Deltaarg4::hisG$  | Wilson <i>et al.</i> 1999 |
| CAKS11      | $\Deltaura3::imm434/\Deltaura3::imm434$<br>$\Deltahis1::hisG/\Deltahis1::hisG \Deltaarg4::hisG/\Deltaarg4::hisG,$ | This study                |

|          |                                                                                                                                                                                        |                                |
|----------|----------------------------------------------------------------------------------------------------------------------------------------------------------------------------------------|--------------------------------|
|          | <i>MTW1/mtw1::HIS1</i>                                                                                                                                                                 |                                |
| CAKS12   | <i>Δura3::imm434/Δura3::imm434</i><br><i>Δhis1::hisG/Δhis1::hisG Δarg4::hisG/Δarg4::hisG,</i><br><i>mtw1::PCK1pr-MTW1(URA3)/mtw1::HIS1</i>                                             | This study                     |
| CAKS13   | <i>Δura3::imm434/Δura3::imm434</i><br><i>Δhis1::hisG/Δhis1::hisG Δarg4::hisG/Δarg4::hisG,</i><br><i>mtw1::MTW1-TAP(URA3)/mtw1::HIS1</i>                                                | This study                     |
| CAKS14   | <i>Δura3::imm434/Δura3::imm434</i><br><i>Δhis1::hisG/his1::hisG Δarg4::hisG/Δarg4::hisG,</i><br><i>mtw1::ts-mtw1(URA3)/mtw1::HIS1</i>                                                  | This study                     |
| YJB10695 | <i>Δura3::imm434/Δura3::imm434</i><br><i>Δhis1::hisG/Δhis1::hisG Δarg4::hisG/Δarg4::hisG,</i><br><i>MTW1/MTW1-GFP (NAT)</i>                                                            | Joglekar <i>et al.</i><br>2008 |
| YJB11482 | <i>Δura3::imm434/Δura3::imm434</i><br><i>Δhis1::hisG/Δhis1::hisG Δarg4::hisG/Δarg4::hisG,</i><br><i>CSE4/cse4::hisG, MTW1/MTW1-GFP(NAT)</i>                                            | This study                     |
| YJB11483 | <i>Δura3::imm434/Δura3::imm434</i><br><i>Δhis1::hisG/Δhis1::hisG Δarg4::hisG/Δarg4::hisG,</i><br><i>cse4::PCK1pr-CSE4(URA3)/cse4::hisG,</i><br><i>MTW1/MTW1-GFP(NAT)</i>               | This study                     |
| YJB10704 | <i>Δura3::imm434/Δura3::imm434</i><br><i>Δhis1::hisG/Δhis1::hisG Δarg4::hisG/Δarg4::hisG,</i><br><i>MTW1-GFP(URA3)/MTW1-GFP(NAT)</i>                                                   | Joglekar <i>et al.</i><br>2008 |
| YJB8675  | <i>Δura3::imm434/Δura3::imm434</i><br><i>Δhis1::hisG/Δhis1::hisG Δarg4::hisG/Δarg4::hisG,</i><br><i>CSE4/CSE4-GFP-CSE4</i>                                                             | Joglekar <i>et al.</i><br>2008 |
| YJB11553 | <i>Δura3::imm434/Δura3::imm434</i><br><i>Δhis1::hisG/Δhis1::hisG Δarg4::hisG/Δarg4::hisG,</i><br><i>mtw1::HIS1/MTW1, CSE4/CSE4-GFP-CSE4</i>                                            | This study                     |
| YJB11554 | <i>Δura3::imm434/Δura3::imm434</i><br><i>Δhis1::hisG/Δhis1::hisG Δarg4::hisG/Δarg4::hisG,</i><br><i>mtw1::PCK1pr-MTW1(URA3)/mtw1::HIS1,</i><br><i>CSE4/CSE4-GFP-CSE4</i>               | This study                     |
| YJB12118 | <i>Δura3::λimm434/ Δura3::λimm434</i><br><i>Δhis1::hisG/Δhis1::hisG</i><br><i>Δarg4::hisG/Δarg4::hisG Δmtw1::HIS1/MTW1,</i><br><i>MIF2/MIF2-GFP-NAT1</i>                               | This study                     |
| YJB12119 | <i>Δura3::λimm434/ Δura3::λimm434</i><br><i>Δhis1::hisG/Δhis1::hisG</i><br><i>Δarg4::hisG/Δarg4::hisG Δmtw1::HIS1/</i><br><i>mtw1::PCK1pr-MTW1(URA3, MIF2/MIF2-GFP-</i><br><i>NAT1</i> | This study                     |
| YJB12176 | <i>Δura3::imm434/Δura3::imm434</i><br><i>Δhis1::hisG/his1::hisG Δarg4::hisG/Δarg4::hisG,</i>                                                                                           | This study                     |

|  |                                       |  |
|--|---------------------------------------|--|
|  | <i>mtw1::ts-mtw1(URA3)/mtw1::HIS1</i> |  |
|  |                                       |  |

**Table S2: Primers used in this study:**

| Primer name | Sequence                                       |
|-------------|------------------------------------------------|
| MTW1-1      | GCCATTGATAATGATTTCAAGAAAATAGATTTTGC            |
| MTW1-2      | AATTTGAGCATTATATTCTTTATTGCATCCACATC            |
| MTW1-3      | GCGAATTCTAATTTACCACACGACAGCAATGAAGTTGG         |
| MTW1-4-1    | GCAAGCTCCGTCGATTAGTATTGATCTATTTTTG             |
| MTW1-5      | GCGGAGCTCCAATAAGAGAAGGAGAGAACTGGCATC           |
| MTW1-6      | GCGGATCCGTACAAGATGAAGTTGTTAAGAATAGCC           |
| MTW1-7      | CCGAAGCTTCAAGGCAGATCTCTACAGATGATGATTGC         |
| MTW1-8      | CCGGATCCGCAAATCTATTTTCTTGAAATCATTATCAA<br>TGGC |
| MTW1-9      | GGGATATTTACCAAACCTTACTGAAGATGAA                |
| MTW1-10     | GATTCTAATTTCCCATCTCAATTTCTATT                  |
| MTW1-15     | GAAGCAAGAAAGCTCCTCATGTCTG                      |
| MTW1-17     | CTAACTTCTGTCTCCTCATCCTCC                       |
| Cal2        | CATGAAGCTTAATTTGAGCATTATATTCTTTATTGC           |
| Cal6        | AACTGCAGCGAAGTTGTAATTCTTGTCATG                 |

|          |                                |
|----------|--------------------------------|
| Cal9     | GGACTAGTATGTCAGATAAACTTTAGACGA |
| Cal16-2  | CCCAAGCTTTTTACCACACGACAGCAATGA |
| Cal17    | CCGCTCGAGAGAACCTTTACAATCACCTAA |
| CA26     | GCGGATCCACTGTATTCCAATTTAAC     |
| CAMA2con | AATTTGAGCATTATATCTTTATTGC      |
| 2498-15  | CAAGCTGCCTTGTCAGGCAAAGCATC     |
| 2498-16  | CCATCTCCAACCCGCCATGCCAGC       |
| 2498-23  | GTATGACCTAAAGCTGTGAGCTGC       |
| 2498-24  | CAGAGCAATGGCCCTTGTGATTGT       |
| 2498-9   | GAAACGATCCTTCCTGTACACCAC       |
| 2498-10  | CTTGATAGCGATCAGTGGGTTTCAG      |
| 2498-21  | CTAGTGCAAGACCCTCATAGAAGC       |
| 2498-22  | CCTGACACTGTCGTTTCCCATAGC       |
| 2498-7   | GCCTGTAGCGATGTAAGTATATGGAG     |
| 2498-8   | CCACCTCTGCACTAATCTACAATGC      |
| 2498-5   | GCGTAACGGGCCTAGTTTCGATAAGAG    |
| 2498-6   | CATGCACAGGCTCTTATAGCAAGT       |
| 2498-19  | GCCATACGGTAGTCAAACCTCCTGG      |
| 2498-20  | CCTGAACCACTACTGCAGAAACGT       |
| 2498-17  | GCTTGGCCCTCAGTATAACTGGAT       |
| 2498-18  | CTTCAGGACAAGCTCCATATCTCTTC     |
| 2498-1   | CACTAACCCCATCTGAAACAAAGCG      |
| 2498-2   | GGTCAGCACAATAATCACTGCACCAAC    |

|                  |                                                                                                       |
|------------------|-------------------------------------------------------------------------------------------------------|
| CALEU2-1         | GTGACCATGTCGGTACCGAAATTGTC                                                                            |
| CALEU2-2         | CTTG TTCAGGACGAACAGTGCCAGTA                                                                           |
| nCEN7-3          | GCATACCTGACACTGTCGTT                                                                                  |
| nCEN7-4          | AACGGTGCTACGTTTTTTTA                                                                                  |
| nLeu2-1          | GTACCGAAATTGTCAATGAAG                                                                                 |
| nLeu2-2          | GTGGTGTTTGAAATCAAATTG                                                                                 |
| CACH5R1          | TTCATGGAAGAGGGGTTTCA                                                                                  |
| CACH5F1          | CCCGCAAATAAGCAAACACT                                                                                  |
| JB658            | TTTGTACAATTCATCCATACCATG                                                                              |
| JB2715           | CATTGATATGATAATACCAGAACAAGACGATATAGATG<br>TGGATGCAATAAAGAATATAAATGCTCAAATTTCTAAA<br>GGTGAAGAATTATT    |
| JB2717           | GCTAGTGGTGGTGGTGGTAATGAAG                                                                             |
| JB2759           | GATACTCAATCTGAAGAACCAAAATTAGTTTTACTTTAT<br>GGAAGATTACATGAAAGATGGCATCAAGCAGGTAAAAC<br>GACGGCCAGTGAATTC |
| JB3551           | GCTGCTACCCAACAAGGATT                                                                                  |
| JB3924 (CEN5 C4) | GTGAGAAGAAAAGTAAATGACTTCGAT                                                                           |
| JB3925 (CEN5 C4) | AAACACTTGCAACCAATACAGG                                                                                |
| JB3993 (CEN7 C3) | CATGACTACTACCCCATAGGCTTT                                                                              |
| JB3994 (CEN7 C3) | TGAAGAGGTTGGTGGTTTTGT                                                                                 |
| JB4165 (LEU2)    | TTTGGTCTTTATGAGCCTTGC                                                                                 |
| JB4166 (LEU2)    | CAAGATTGTAGCAATTGGATTCAC                                                                              |



|                   |                                                                                                             |
|-------------------|-------------------------------------------------------------------------------------------------------------|
| JB3912 (CEN5 L1)  | ACTTTCCTATCTGATGTTGCAC                                                                                      |
| JB3913 (CEN5 L1)  | TTTGTCAGGTCATCATCATTCTT                                                                                     |
| JB3876 (CEN5 IR1) | TCTAGTGGGCTATTGTCTGTGG                                                                                      |
| JB3877 (CEN5 IR1) | CGCAAGAATTTTGTAACTTTGTG                                                                                     |
| JB3878 (CEN5 IR3) | CCAAGTAAACAAAATTTCCAC                                                                                       |
| JB3879 (CEN5 IR3) | TGAGACAATGCTGCTAACGAG                                                                                       |
| JB3922 (CEN5 C2)  | CCCTCTGTTGCTGTTACTTGAG                                                                                      |
| JB3923 (CEN5 C2)  | TTTTGTATAAAGCAAGGCATTGAA                                                                                    |
| JB3880 (CEN5 C3)  | TCATACACTAGCCTGTGCTCCTA                                                                                     |
| JB3881 (CEN5 C3)  | TGATCGCATGAGAGAGTTGG                                                                                        |
| JB3926 (CEN5 C5)  | AGGTGATTGTTGCATAGTCATTTC                                                                                    |
| JB3927 (CEN5 C5)  | GGCTATAACTTCTAACTGGCATTGT                                                                                   |
| JB3933 (CEN5 R1)  | CCAGCATCATCAGGCTCTTAA                                                                                       |
| JB3934 (CEN5 R1)  | TGACAGAGATAGGATGCGTTATG                                                                                     |
| JB4674            | TATTGGCCAAGGTGATGCTTATTTGTTTTTCGTTCAAAT<br>CAGAAAACCAGAAGAAATCGATACCAATTGGGGTGGTG<br>GTTCTAAAGGTGAAGAATTATT |
| JB4675            | GACAAGGGTTATTAACCTCGTGAACCTTCAAACAAAATG<br>TAGCATTAAATACTCGGCACAGTTGTAAACAGTAAAA<br>CGACGGCCAGTGAATTC       |
| p2488-1           | CACTCTGACCAAATTCTCGTTTCC                                                                                    |
| p2488-2           | GCAACATCCGAGTAAGGTTTGTGG                                                                                    |
| CACH2F            | ACTGCTGGGCTTGTGAAGTT                                                                                        |

|         |                       |
|---------|-----------------------|
| CACH2R  | GAGTCACAGCCAAACACGAA  |
| CACH3F  | AGATATGACGGCGCTGTTG   |
| CACH3R  | CAAACATCAACCTCCCAAT   |
| FCaCEN4 | AGTACTTCATACAATCTTGGG |
| RCaCEN4 | GGAAGAGTATGGTGTAG     |
| CEN5-5F | TACTTCTGGTCAACGAGGCT  |
| CEN5-5R | CCAATACAGGTTCCAATATG  |
